# Supplementary material
Source: ML conference proceedings conference paper supplement (https://openreview.net/forum?id=FAGY52HbyV)
Supplement: supplementary_material [file attachment]

# Debiased and Denoised Entity Recognition from Distant Supervision (Appendix)

Anonymous Author(s)

Affiliation

Address

email

## A Dataset-Task Taxonomy

### A.1 Dataset Taxonomy

We provide Figure 5 to show the dataset taxonomy in the overall training workflow. We first split the initial dataset  $\mathcal{D}$  into two sub-datasets  $\mathcal{D}_b$  and  $\mathcal{D}_e$  through decoupled learning to mitigate the distributional bias (first level split). Next, to process respective noise in  $\mathcal{D}_b$  and  $\mathcal{D}_e$ , we conduct a selection and self-training framework. We divide the two parts into the clean set and noisy set by clean token selection (second level split), then perform a standard classification on each clean set. As for noisy token sets, we adopt debiased self-training to yield pseudo-labels for further training.

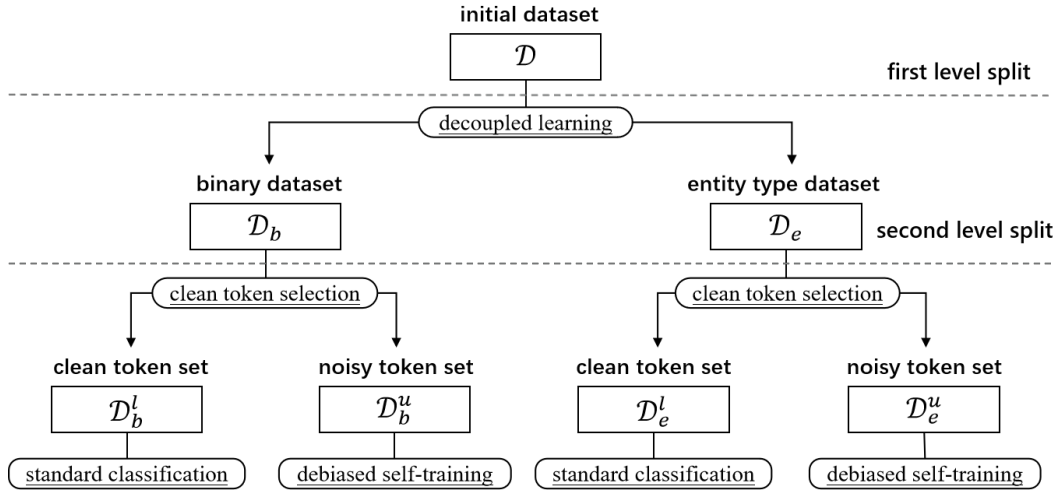

Figure 5: Illustration of dataset taxonomy.

### A.2 Task Taxonomy and Model architecture

DesERT modifies the basic NER model architecture with the double-head pathway, yet reserves a shared pre-trained language model encoder such as RoBERTa-base denoted by  $\phi$ . Given any sentence  $\mathbf{x}$  with its binarized labels  $\mathbf{y}^b$  and entity type labels  $\mathbf{y}^e$ ,  $(\mathbf{x}, \mathbf{y}^b) \in \mathcal{D}^b$  and  $(\mathbf{x}, \mathbf{y}^e) \in \mathcal{D}^e$ .  $\mathbf{x}$  is first fed to the PLM encoder  $\phi$  and we take the last hidden layer output of  $\phi$  as finally embeddings  $\phi(\mathbf{x})$ . Then the double-head pathway  $h_b$  and  $h_e$  take  $\phi(\mathbf{x})$  as input to yield respective predictions. The binary pathway  $h_b$  generates the probability of being entity tokens,  $\mathbf{p}^b = \text{sigmoid}(h_b \circ \phi(\mathbf{x})) = [p_1^b, \dots, p_n^b]$ , then take  $\mathbf{p}^b > 0.5$  as predicted binary labels  $\hat{\mathbf{y}}^b$ . While the entity pathway  $h_e$  offers fine-grained

entity type probabilities  $\mathbf{p}^e = \text{softmax}(h_e \circ \phi(\mathbf{x})) = [\mathbf{p}_1^e, \dots, \mathbf{p}_n^e]$ , where each  $\mathbf{p}_i^e$  has  $K$  entries. We take  $\arg \max(\mathbf{p}^e)$  as predicted entity type labels  $\hat{\mathbf{y}}^e$ , and note that non-entity tokens are tagged with invalid labels. Finally, any standard classification loss can be calculated on the double-head pathway. We also refer the reader to Figure 1 for visualized illustration.

## B Theoretical Insights of Debiased Semi-supervised Learning

Though there is no available theory on why the worst cross-entropy (WCE) [1] works, we would like to provide the following (relatively) theoretical insights that may help the readers to perceive our approach better.

Notably, the self-training bias is mainly caused by noisy tokens approaching the decision boundaries, whose pseudo-labels keep changing. To this end, we optimize WCE to learn compact token clusters for reducing wrong pseudo-label assignments. To see this, we start from the following simplified example to show that WCE does indeed concentrates the token representation.

**Assumption.** Consider a binary classification problem, as the simplest form of DSNER. Denote the input variable by  $X$  and the output variable by  $Y$  from binary labels  $\{+1, -1\}$ . The labeled data  $\mathcal{D}^l$  are sampled from  $X|Y = +1 \sim U(\mathcal{B}(u, r))$  and  $X|Y = -1 \sim U(\mathcal{B}(v, r))$ . Here  $\mathcal{B}(u, r)$  denotes a spherical ball with center  $u$  and radius  $r$ .  $U$  denotes uniform distributions. The unlabeled sample  $\mathcal{D}^u$  are all from  $Y = +1$  but uniformly distributed inside the  $\mathcal{B}((u+v)/2, r')$ . Three balls have no intersection. Finally, we assume the maximum margin classifier is used, which is a hard proxy of the cross-entropy loss.

**Derivation Sketch.** At first glance, it is obvious that the optimal classifier on  $\mathcal{D}^l$  is  $f = (u+v)/2$  which misclassifies half of the examples in  $\mathcal{D}^u$ . The worst classifier, however, amounts to be  $f^w = (u+v)/2 - r'$  which perfectly classifies  $\mathcal{D}^l$  but possesses the most side-way decision boundary. Next, we optimize the feature extractor  $\phi$  to match the worst decision boundary by  $\min_{\phi} L_U(y, f^w)$ . This is to say, with ideally known labels, the unlabeled ball  $\mathcal{B}((u+v)/2, r')$  converges to  $\mathcal{B}(f = (u+v)/2 - r', r')$ . With full samples  $X|Y = +1$  getting closer, the classifier achieves better generalization with *compact clusters* and low-entropy decision boundaries.

In practice, since the true labels are unknown, we use pseudo-labels as a proxy since most unlabeled data are assigned true labels. So, the representation will be partially concentrated.

**Empirical Covariance.** We conduct experiments on CoNLL03 to show the covariance of data to their class centers and the quality of pseudo labels as follows. When DeSERT is run without WCE, the average covariance amongst classes is 0.0085. With WCE, the average covariance amongst classes becomes 0.0056. Thereafter, we can conclude that WCE indeed concentrates the tokens and mitigates the self-training bias.

## C Additional Experimental Setups and Results

In what follows, we show more experimental details and results. In section C.1, we report more empirical results, including an interesting series of experiments where *additional distant supervision* comes from large language models like ChatGPT. In section C.2, we provide more details on our experiments and implementation.

### C.1 Results with Additional Distant Supervision from ChatGPT

Recently, large language models (LLMs), including GPT-3 [2], ChatGPT, and GPT-4<sup>1</sup>, have largely revolutionized the NLP landscape. Thanks to their emerging abilities like in-context learning (ICL) [3] and chain-of-thought [4], LLMs demonstrate remarkable zero-shot learning performance in a wide range of downstream NLP tasks. Despite the promise, some recent studies [5] have shown that LLMs are still legs behind the fine-tuned small language models in many NLP applications.

Motivated by this, we conduct experiments to show the zero-shot performance of ChatGPT on the NER problem. In Table 3, we observe that ChatGPT does indeed demonstrates inferior results even

<sup>1</sup><https://openai.com/blog/chatgpt>

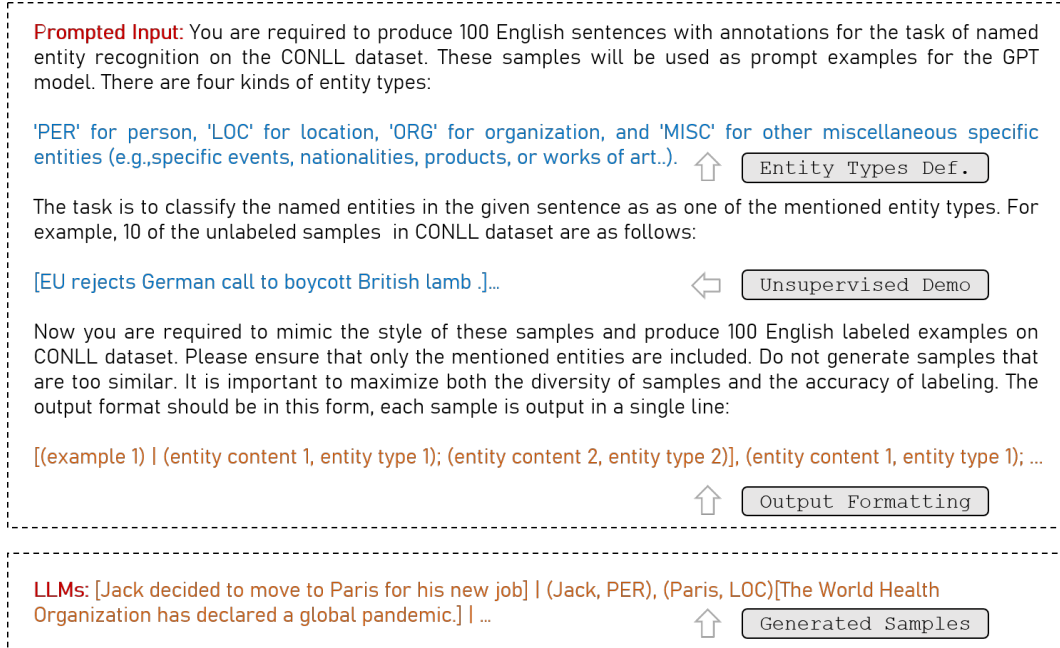

Figure 6: An example prompt for automatic demonstration data generation.

63 compared with distantly-supervised SLMs. Therefore, a question arises: *how can LLMs better*  
 64 *support NER with minimal human annotation?* Among the numerous potential solutions, we propose  
 65 a natural extension of the conventional distantly-supervised NER problem. This extension considers  
 66 LLM’s predictions on the training set as additional distant supervision. To achieve this, we present a  
 67 new tagging scheme for NER and modified our algorithm to accommodate multiple sources of distant  
 68 supervision. Subsequently, we provide a detailed elaboration on the aforementioned aspects.

### 69 C.1.1 Tagging by Auto-Demonstration

70 Instead of directly performing zero-shot testing, we introduce a new DSNER paradigm that generates  
 71 distant labels by LLMs for *unsupervised training data* to improve the SLMs’ performance. To  
 72 generate distant labels, a straightforward solution is to send the raw training texts to the LLMs and  
 73 ask them to output all the entities along with their types. However, we find such a naive strategy fails  
 74 to achieve satisfactory NER performance. To mitigate this problem, we design a novel in-context  
 75 learning algorithm that exploits self-generated text-tag pairs to guide the tagging process.

76 **Automatic Text-Tag Pair Generation.** Our ultimate goal is to perform few-shot in-context  
 77 learning that better guides the LLMs to locate the entities and output their types. To achieve this,  
 78 we may assume a set of demonstration text-tag pair samples are available. Besides, this set ought to  
 79 be diverse and representative enough to guide in-context learning. However, the training samples  
 80 are unsupervised and cannot be utilized directly. To address this problem, we propose to generate  
 81 sentences by ChatGPT itself, while ensuring the diversity of the generated results to cover all entity  
 82 types. Additionally, we randomly retrieve unlabeled samples from the training set and employ  
 83 ChatGPT to automatically generate a comprehensive set of sentences, including their corresponding  
 84 entity tags. An example prompt is shown in Figure 6.

85 **Few-Shot In-Context Learning for NER Tagging.** After that, we ask the ChatGPT to tag the  
 86 whole training set by using its self-generated demonstrations. However, directly feeding all the  
 87 generated samples for ICL may exceed contextual limits and incur high computational costs. To  
 88 remedy this problem, before feeding the true query sentence, we retrieve the top- $k$  demo samples by  
 89 the cosine similarity. Empirically, we exploit the BERT embedding for similarity calculation, which  
 90 performs generally better than ChatGPT embedding. Finally, we instruct ChatGPT to output the NER  
 91 tags for the entire unsupervised training set. An example prompt is shown in Figure 7.

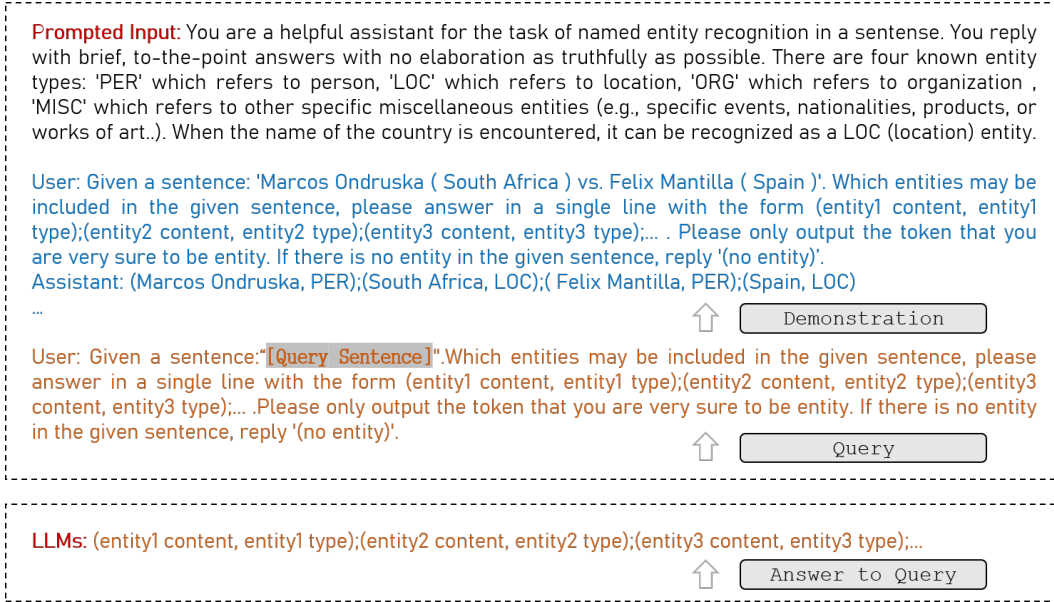

Figure 7: An example prompt for few-shot in-context tagging for a *query sentence*. The demonstrations are automatically generated and selected.

### 92 C.1.2 Modification of DesERT for Multi-Source Distant Labels

93 One may directly use the ChatGPT labels to train the DSNER models. However, the original knowl-  
 94 edge base-driven distant supervision is also free lunch for DSNER. and can be further incorporated.  
 95 Notably, such a hybrid distant label from multiple sources problem has never been touched in the  
 96 NER community. Fortunately, our DesERT algorithm can well address such hybrid labels with only a  
 97 few modifications. Assume we are given knowledge base-driven labels  $y_{kb}$  (KB Labels) and ChatGPT  
 98 Labels  $y_{cg}$  for a token  $x$ , where we slightly abuse the subscript to distinguish these two labels. To  
 99 warm up the model, we calculate a mean soft label by,

$$\hat{y}^{mean} = (\text{OneHot}(y^{kb}) + \text{OneHot}(y^{cg}))/2$$

100 Therefore, the model fits equal confidence on these two labels when a token receives two disagreed  
 101 labels. After that, we develop a modified selection protocol. Take the binary head as an example, we  
 102 receive a set of transformed distant labels  $\tilde{Y}^b = \{\tilde{y}_{kb}^b, \tilde{y}_{cg}^b\}$  for each token and then perform the token  
 103 selection by,

$$\mathcal{D}_b^l = \{(x, \tilde{Y}^b) | \mathbb{I}(\tilde{y}^b \in \tilde{Y}^b) \wedge (\max(p^b, 1 - p^b) > \tau)\}$$

104 In other words, we regard either distant label as a candidate of the ground truth. Once there is one  
 105 label in this label set that exhibits high confidence, we regard it as a clean token. Finally, we run the  
 106 DesERT algorithm without any further modification. Notably, these can be easily extended to more  
 107 sources of distant supervision, e.g., when there is more than one LLM available.

### 108 C.1.3 Experimental Results with ChatGPT Supervision

109 Our experiments are conducted on the CoNLL03 dataset. In specific, we generate a total of 100  
 110 automatically generated samples with the help of 10 demonstration training samples. When tagging  
 111 training data, we select the 10 most similar generated samples for ICL. In Figure 8, we plot the  
 112 confusion matrix of the ChatGPT labels. It can be observed that ChatGPT supervision demonstrates  
 113 similar trends to KB labels and is still biased. Nevertheless, ChatGPT labels have three main  
 114 characteristics: (1) it classifies far more non-entity tokens as an entity; (2) it produces more balanced  
 115 clean tokens; (3) the confusion patterns on fine-grained entity types are different than KB labels.

116 In Table 3, we report the results of DesERT when it faces different sources of distant supervision  
 117 signals. In particular, we compare three types of baselines: (1) **ChatGPT**: we employ the ChatGPT  
 118 model to produce zero-shot tagging on testing data; (2) **ChatGPT-A**: we employ ChatGPT to generate

Table 3: Performance of DesERT with different sources of distant labels.

| Supervision | Unsupervised |           | ChatGPT Labels |        | KB Labels    |        | Hybrid Labels |              |
|-------------|--------------|-----------|----------------|--------|--------------|--------|---------------|--------------|
| Model       | ChatGPT      | ChatGPT-A | SCDL           | DesERT | SCDL         | DesERT | SCDL*         | DesERT*      |
| Precision   | 68.95        | 79.11     | 68.39          | 81.91  | <b>87.96</b> | 86.23  | 83.87         | 87.24        |
| Recall      | 64.16        | 63.13     | 72.74          | 77.38  | 79.82        | 87.28  | 85.50         | <b>88.93</b> |
| F1          | 66.47        | 70.22     | 70.50          | 79.58  | 83.69        | 86.75  | 84.67         | <b>88.08</b> |

a set of text-tag pairs and use it for few-shot ICL on testing data; (3) **SCDL**: the most competitive baseline in our main Table. From Table 3, we have the following observation:

- ChatGPT-A is much better than vanilla ChatGPT, verifying the superiority of our automatic demonstration process. But, ChatGPT and ChatGPT-A underperform other DSNER algorithms on the testing set. Though ChatGPT is a wonderful general-purpose LLM, we may draw the same conclusion as [5] that fine-tuned SLMs still play an important role in NLP.
- Given ChatGPT labels, both SCDL and DesERT underperform their counterparts when supervised by KB labels. We postulate that current DSNER algorithms are particularly designed for KB-based supervision and thus can not fully handle such new sources of labels.
- Our proposed DesERT algorithm consistently outperforms baselines on different supervised signals. In particular, when trained with hybrid labels, the modified DesERT (DesERT\*) improves the KB label-trained counterpart by **+1.32** F1 score. It suggests that distant supervision from LLMs does indeed bring helpful information for the DSNER task.

In summary, our work makes the first attempt to employ LLMs to generate distant supervision. Moreover, our DesERT algorithm can be easily extended to learn from multi-source distant labels and demonstrates improved performance.

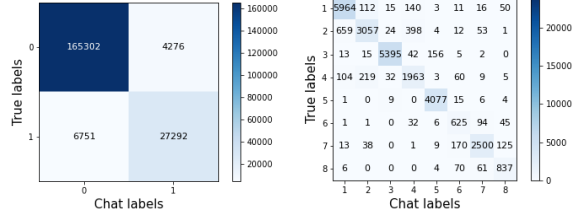

Figure 8: **Left**: Confusion matrix of true labels and ChatGPT labels on CoNLL03. **Right**: The confusion matrix displays noise among true entity-type labels in ChatGPT labels.

## C.2 More Experimental Details

In this section, we provide more experimental details for a better understanding of our training process and also to ensure the reproducibility.

### C.2.1 Computation Resources

All experiments are conducted on a workstation with 8 NVIDIA RTX A6000 GPUs. It takes about {8, 72, 0.5, 1, 2} hours for training on five benchmarking datasets (ordered as in Table 1) with one single GPU. We adopt the Huggingface Transformer library for the RoBERTa-base (125M parameters) and DistilRoBERTa-base (66M parameters) models: <https://huggingface.co/transformers/>. We run all the experiments three times and report the mean results.

### C.2.2 Datasets Details

The data statistics of five benchmarking NER datasets are shown in Table 4.

## C.3 More Implementation Details

**Tagging scheme for NER** As for tagging scheme, we follow the classic BIO format. To be specific, the first token of an entity mentioned with type X is tagged as B-X while the remaining tokens inside that entity are labeled as I-X, and the non-entity tokens are annotated as O. Such a scheme is more difficult than a simple IO format, especially for distant supervision.

Table 4: The statistics of five datasets, shows the number of entity types and the number of sentences in the Train/Dev/Test set.

| Dataset      | Types | Train   | Dev    | Test   |
|--------------|-------|---------|--------|--------|
| CoNLL03      | 4     | 14,041  | 3,250  | 3,453  |
| OntoNotes5.0 | 18    | 115,812 | 15,680 | 12,217 |
| Webpage      | 4     | 385     | 99     | 135    |
| Wikigold     | 4     | 1,142   | 280    | 274    |
| Twitter      | 10    | 2,393   | 999    | 3,844  |

**Clean token selection for the binary pathway** In general, the precision of entity labels is relatively high, e.g., about 97.96%(23,649/24,141) in the CoNLL03 dataset. That indicates us most distantly-labeled entity tokens are real entities if omit fine-grained entity types. Therefore, when performing clean token selection on the binary pathway, it only selects non-entity tokens by the matched and high-confidence strategy while including all tokens labeled as entities.

**Soft label for the entity pathway** When training on the selected clean token set, the binary pathway regards distant labels as true labels. However, we discard the distant hard labels but adopt the teacher model’s output logits to derive soft labels [6] for the entity pathway, given by:

$$\hat{y}_{i,j}^s = \frac{\mathbf{p}_{i,j}^2 / \sum_i \mathbf{p}_{i,j}}{\sum_{j'} (\mathbf{p}_{i,j'}^2 / \sum_i \mathbf{p}_{i,j'})}$$

where  $\mathbf{p}_{i,j} = \text{softmax}(f_{i,j}(\mathbf{x}; \theta_t))$ , is the probability of  $i$ -th token belonging to class  $j$  in sentence  $\mathbf{x}$ , then calculate a Kullback-Leibler divergence loss. Because soft labels usually preserve sufficient information and encourage a more balanced assignment of target labels.

**The implementation of teacher-student newtork** When splitting the clean token set and the noisy token set, we let the teacher model select respective clean tokens to train the student model. Specifically, the teacher model’s double-head pathway filters reliable clean tokens independently following the previous criterion. Then the double-head of the student model is trained with selected clean tokens and corresponding labels. The teacher model parameters are periodically updated by the student model with EMA, given by:

$$\theta_t = \alpha \theta_t + (1 - \alpha) \theta_s$$

where  $\alpha$  is a positive constant and is empirically fixed as 0.99 for Webpage/Wikigold and 0.995 for the remaining datasets. Finally, to train the entity pathway, we adopt a KL divergence loss on the student model’s output logits and corresponding soft labels from the teacher model’s prediction. The formulation is:

$$\mathcal{L}_{e\_cls}(\hat{\mathbf{y}}^s, f(\mathbf{x}; \theta_s)) = \sum_i \sum_j -\hat{y}_{ij}^s \log f_{ij}(\mathbf{x}; \theta_s) + f_{ij}(\mathbf{x}; \theta_s) \log(f_{ij}(\mathbf{x}; \theta_s))$$

Then, the student model’s entity pathway is trained to approximate the soft labels. While for the binary pathway, we calculate a standard binary cross-entropy loss, which is given by:

$$\mathcal{L}_{b\_cls}(\tilde{y}^b, \hat{y}^b) = -\tilde{y}^b \log \hat{y}^b - (1 - \tilde{y}^b) \log(1 - \hat{y}^b)$$

where  $\tilde{y}^b$  is the given distant label and  $\hat{y}^b$  is generated by student model’s binary pathway.

## D Pseudo-Code of DesERT

We describe the overall training pipeline of DesERT in Algorithm 1.

## E Limitations

While DesERT has been proven to be effective for distant supervision, it is still subject to certain limitations. First, in our debiased self-training procedure, our WCE loss is estimated from pseudo-labels instead of the real ones. While we empirically find our WCE loss works well, its performance

---

**Algorithm 1** Training workflow of DesERT

---

**Input:** Training data  $\mathcal{D} = \{(\mathbf{x}_i, \tilde{\mathbf{y}}_i)\}_{i=1}^M$  with distant labels; two sets of teacher-student networks,  $\theta_{t1}, \theta_{s1}$  and  $\theta_{t2}, \theta_{s2}$ ;

```
1:  $t \leftarrow 0$ 
   /* Selection and self-training */
2: while  $t < T_1$  do
3:   Get a batch  $\mathcal{B} = \{(\mathbf{x}_i, \tilde{\mathbf{y}}_i)\}_{i=1}^B \subset \mathcal{D}$ ;
4:   if  $t < k$  then
5:      $\mathcal{B}_b \cup \mathcal{B}_e \leftarrow \mathcal{B}$ ; //decoupled datasets
6:      $\bar{\mathcal{B}}_b^1 = \{\mathcal{B}_b^{l,1}, \mathcal{B}_b^{u,1}\} \leftarrow \text{Sel}(f(\theta_{t1}), \mathcal{B}_b)$ ;
7:      $\bar{\mathcal{B}}_e^1 = \{\mathcal{B}_e^{l,1}, \mathcal{B}_e^{u,1}\} \leftarrow \text{Sel}(f(\theta_{t1}), \mathcal{B}_e)$ ;
8:      $\bar{\mathcal{B}}_b^2 = \{\mathcal{B}_b^{l,2}, \mathcal{B}_b^{u,2}\} \leftarrow \text{Sel}(f(\theta_{t2}), \mathcal{B}_b)$ ;
9:      $\bar{\mathcal{B}}_e^2 = \{\mathcal{B}_e^{l,2}, \mathcal{B}_e^{u,2}\} \leftarrow \text{Sel}(f(\theta_{t2}), \mathcal{B}_e)$ ;
10:    Update  $\theta_{s1}$  with  $\{\bar{\mathcal{B}}_b^1, \bar{\mathcal{B}}_e^1\}$  by minimizing  $\mathcal{L}$ ;
11:    Update  $\theta_{s2}$  with  $\{\bar{\mathcal{B}}_b^2, \bar{\mathcal{B}}_e^2\}$  by minimizing  $\mathcal{L}$ ;
12:   else
13:      $\mathcal{X}_B \leftarrow \{(\mathbf{x}_i)\}_{i=1}^B$ 
14:      $\bar{\mathcal{B}}_b \cup \bar{\mathcal{B}}_e \leftarrow \text{Guess}(f(\theta_{t1}), f(\theta_{t2}), \mathcal{X}_B)$ ;
15:     Update  $\theta_{s1}, \theta_{s2}$  with  $\{\bar{\mathcal{B}}_b, \bar{\mathcal{B}}_e\}$  by minimizing  $\mathcal{L}$ 
16:   end if
17:    $\theta_{t1} \leftarrow \text{EMA}(\alpha, \theta_{t1}), \theta_{t2} \leftarrow \text{EMA}(\alpha, \theta_{t2})$ 
18:    $t \leftarrow t + 1$ 
19: end while
   /* Post-hoc entity pathway finetuning */
20: while  $t < T_1 + T_2$  do
21:   Get a batch  $\mathcal{B} = \{(\mathbf{x}_i, \tilde{\mathbf{y}}_i)\}_{i=1}^B \subset \mathcal{D}$ ;
22:    $\mathcal{X}_B \leftarrow \{(\mathbf{x}_i)\}_{i=1}^B, \tilde{\mathcal{Y}}_B \leftarrow \{(\tilde{\mathbf{y}}_i)\}_{i=1}^B$ 
23:    $\bar{\mathcal{B}}_e^1 \leftarrow \text{EntitySel}(f(\theta_{t1}), \mathcal{X}_B, \tilde{\mathcal{Y}}_B)$ ;
24:    $\bar{\mathcal{B}}_e^2 \leftarrow \text{EntitySel}(f(\theta_{t2}), \mathcal{X}_B, \tilde{\mathcal{Y}}_B)$ ;
25:   Finetuning  $\theta_{s1}$  with  $\bar{\mathcal{B}}_e^1$ 
26:   Finetuning  $\theta_{s2}$  with  $\bar{\mathcal{B}}_e^2$ 
27:    $\theta_{t1} \leftarrow \text{EMA}(\alpha, \theta_{t1}), \theta_{t2} \leftarrow \text{EMA}(\alpha, \theta_{t2})$ 
28:    $t \leftarrow t + 1$ 
29: end while
```

---

186 is theoretically restricted. One potential solution is to estimate a small validation set to remedy this  
187 problem, but we leave it as our future work. Second, while the imbalance between entity labels is  
188 located in Figure 1, our framework does not particularly integrate special components to explicitly  
189 overcome this problem. We believe it is not hard to draw inspiration from the recent achievement in  
190 long-tailed learning to further improve the NER performance. Lastly, since DesERT ensembles two  
191 sets of teacher-student networks as previous works did [7, 8], we should train peer-student models  
192 simultaneously and utilize the predictions from dual-teacher models iteratively, thus resulting in  
193 relatively higher training costs. We hope future efforts are made in alleviating the cost of network  
194 ensembling.

## 195 F Ethics Statement

196 While distant supervision is deemed a cheap way to collect and curated training data, the off-the-shelf  
197 and external knowledge bases steering the autonomous annotation procedure may include bias and  
198 unfairness. Indeed, if one trains the model by these biased labels, it may unpleasantly yield unfair  
199 and biased predictions on the basis of characteristics like race, gender, disabilities, LGBTQ, or  
200 political orientation. Therefore, when deploying our DesERT framework, it is recommended to equip  
201 it with some auxiliary tools for labeling censorship so as to improve overall fairness and ethical

202 standard. Grounded on this, we would suggest regarding our DesERT framework as an auxiliary  
203 weakly-supervised annotation tool for assisting human annotations.

## 204 References

- 205 [1] Baixu Chen, Junguang Jiang, Ximei Wang, Pengfei Wan, Jianmin Wang, and Mingsheng Long.  
206 Debiased self-training for semi-supervised learning. In *Advances in Neural Information Process-*  
207 *ing Systems*, 2022.
- 208 [2] Tom B. Brown, Benjamin Mann, Nick Ryder, Melanie Subbiah, Jared Kaplan, Prafulla Dhariwal,  
209 Arvind Neelakantan, Pranav Shyam, Girish Sastry, Amanda Askell, Sandhini Agarwal, Ariel  
210 Herbert-Voss, Gretchen Krueger, Tom Henighan, Rewon Child, Aditya Ramesh, Daniel M.  
211 Ziegler, Jeffrey Wu, Clemens Winter, Christopher Hesse, Mark Chen, Eric Sigler, Mateusz  
212 Litwin, Scott Gray, Benjamin Chess, Jack Clark, Christopher Berner, Sam McCandlish, Alec  
213 Radford, Ilya Sutskever, and Dario Amodei. Language models are few-shot learners. In *Advances*  
214 *in Neural Information Processing Systems 33: Annual Conference on Neural Information*  
215 *Processing Systems 2020, NeurIPS 2020, December 6-12, 2020, virtual*, 2020.
- 216 [3] Jason Wei, Yi Tay, Rishi Bommasani, Colin Raffel, Barret Zoph, Sebastian Borgeaud, Dani  
217 Yogatama, Maarten Bosma, Denny Zhou, Donald Metzler, Ed H. Chi, Tatsunori Hashimoto,  
218 Oriol Vinyals, Percy Liang, Jeff Dean, and William Fedus. Emergent abilities of large language  
219 models. *Trans. Mach. Learn. Res.*, 2022, 2022.
- 220 [4] Jason Wei, Xuezhi Wang, Dale Schuurmans, Maarten Bosma, Brian Ichter, Fei Xia, Ed H. Chi,  
221 Quoc V. Le, and Denny Zhou. Chain-of-thought prompting elicits reasoning in large language  
222 models. In *NeurIPS*, 2022.
- 223 [5] Yejin Bang, Samuel Cahyawijaya, Nayeon Lee, Wenliang Dai, Dan Su, Bryan Wilie, Holy  
224 Lovenia, Ziwei Ji, Tiezheng Yu, Willy Chung, Quyet V. Do, Yan Xu, and Pascale Fung. A  
225 multitask, multilingual, multimodal evaluation of chatgpt on reasoning, hallucination, and  
226 interactivity. *CoRR*, abs/2302.04023, 2023.
- 227 [6] Junyuan Xie, Ross B. Girshick, and Ali Farhadi. Unsupervised deep embedding for clustering  
228 analysis. In *ICML*, volume 48 of *JMLR Workshop and Conference Proceedings*, pages 478–487.  
229 JMLR.org, 2016.
- 230 [7] Xinghua Zhang, Bowen Yu, Tingwen Liu, Zhenyu Zhang, Jiawei Sheng, Xue Mengge, and  
231 Hongbo Xu. Improving distantly-supervised named entity recognition with self-collaborative  
232 denoising learning. In *Findings of the Association for Computational Linguistics: EMNLP*  
233 *2021*, pages 1518–1529, Punta Cana, Dominican Republic, November 2021. Association for  
234 Computational Linguistics.
- 235 [8] Junnan Li, Richard Socher, and Steven C. H. Hoi. Dividemix: Learning with noisy labels as  
236 semi-supervised learning. In *ICLR*. OpenReview.net, 2020.
